# Supplementary material for: Starting at the community: Treatment-seeking pathways of children with suspected severe malaria in Uganda
Source: PLOS Glob Public Health. 2023 Jul 5;3(7):e0001949. doi: 10.1371/journal.pgph.0001949 (PMC10321646; doi:10.1371/journal.pgph.0001949)
Supplement: S3 Table — PHC = primary health centre, RHF = referral health facility. (XLSX) [file pgph.0001949.s003.xlsx]

## Sheet: Sheet1
	PHC			RHF			Private clinic			Drug shop
	N	%		N	%		N	%		N	%
Received injection	44	100		558	100		517	100		49	100
Type of injectable drug*
Artesunate	18	40.9		462	82.8		142	27.5		15	30.6
Artemether	2	4.5		9	1.6		111	21.5		20	40.8
Quinine	6	13.6		19	3.4		62	12		5	10.2
Other	4	9.1		40	7.2		18	3.5		1	2
Don't know	18	40.9		74	13.3		205	39.7		10	20.4
* Administration of multiple injectable drugs is possible
